# Supplementary material for: Estimation of nitrogen leaching load from agricultural fields in the Puck Commune with an interactive calculator
Source: PeerJ. 2020 Mar 27;8:e8899. doi: 10.7717/peerj.8899 (PMC7104721; doi:10.7717/peerj.8899)
Supplement: Supplemental Information 1 [file peerj-08-8899-s001.xlsx]

## Sheet: Sheet1
crop_id	crop_name	recommended_nitrogen_dose [kg N/tonne of product]
1	Winter wheat	27
2	Horse bean	8
3	Sugar beet (tops ploughed down)	3.5
4	Forage beet	2.5
5	Bean	3.4
6	Pea	8
7	Pea (for fodder)	8
8	Spring barley	21
9	Winter barley	24
10	Clover	0
11	Clover with grass	2.3
12	Sweetcorn	2.4
13	Straw – corn	26
14	Flax	40.3
15	Lupine	0
16	Lucerne	0
17	Lucerne with grass	2.3
18	Spring cereal mixtures	24
19	Grain mixtures (grain)	27
20	Grain and legume mixtures (grain)	15
21	Oat	22.2
22	Green oat	4
23	Spring wheat	27
24	Spring triticale	27
25	Winter triticale	27
26	Spring oilseed rape	50
27	Winter oilseed rape	50
28	Late potato	4.2
29	Early potato	3.3
30	Spring rye	24
31	Green rye	4.1
32	Winter rye	24
